# Supplementary material for: The improvement in hole-transporting and electroluminescent properties of diketopyrrolopyrrole pigment by grafting with carbazole dendrons
Source: Royal Society of Chemistry journal article supplement (doi:10.1039/d1ra00805f), 2021-01-01
Supplement: d1ra00805f1.pdf [file d1ra00805f1.pdf]

## Supporting Information

### Improvement of hole-transporting and electroluminescent properties of diketopyrrolopyrrole pigment by grafting with carbazole dendrons

Wipaporn Kitisiworaphan,<sup>a</sup> Thanyarat Chawanpunyawat,<sup>b</sup> Thanaporn Manyum,<sup>a</sup> Pongsakorn Chasing,<sup>b</sup> Supawadee Namuangruk,<sup>c</sup> Taweesak Sudyoadsuk,<sup>b</sup> Vinich Promarak<sup>bd\*</sup>

<sup>a</sup> School of Chemistry, Institute of Science, Suranaree University of Technology, Muang District, Nakhon Ratchasima 30000, Thailand

<sup>b</sup> Department of Materials Science and Engineering, School of Molecular Science and Engineering, Vidyasirimedhi Institute of Science and Technology, Wangchan, Rayong 21210, Thailand. E-mail: [vinich.p@vistec.ac.th](mailto:vinich.p@vistec.ac.th)

<sup>c</sup> National Nanotechnology Center (NANOTEC), National Science and Technology Development Agency, Pathum Thani 12120, Thailand

<sup>d</sup> Research Network of NANOTEC-VISTEC on Nanotechnology for Energy, Vidyasirimedhi Institute of Science and Technology, Wangchan, Rayong 21210, Thailand.

---

#### 1. Synthesis and characterization

**G1-hexyl bromide (2):** 1,6-Dibromohexane (2.8 mL, 18.0 mmol) was added to a mixture of 3,6-di-*tert*-butyl-carbazole (**1**) (1.0 g, 3.6 mmol), KOH (0.81 g, 14.4 mmol), and *N,N*-dimethylformamide (DMF, 50 mL) at 0°C. The system was stirred at room temperature for 24 h and then diluted with water (100 mL). The solution was extracted with CH<sub>2</sub>Cl<sub>2</sub> (3 x 50 mL), and the combined organic layers, dried over anhydrous Na<sub>2</sub>SO<sub>4</sub> and concentrated under reduced pressure. The crude product was purified by column chromatography (CH<sub>2</sub>Cl<sub>2</sub>/hexane) to afford white solids (1.22 g, 77%); <sup>1</sup>H-NMR (600 MHz, CDCl<sub>3</sub>): δ = 8.10 (s, 2H), 7.50 (d, *J* = 8.4 Hz, 2H), 7.30 (d, *J* = 8.4 Hz, 2H), 4.25 (t, *J* = 7.2 Hz, 2H), 3.36 (t, *J* = 6.6 Hz, 2H), 1.81-1.90 (m, 4H), 1.44 (s, 18H), 1.41-1.39 (m, 4H); <sup>13</sup>C-NMR (150 MHz, CDCl<sub>3</sub>): δ = 141.5, 139.0, 123.3, 122.7, 116.3, 108.0, 43.0, 34.7, 33.7, 32.6, 32.4, 32.1, 29.0, 28.0, 26.5; *m/z* (MALDI-TOF): 441.3330 (C<sub>26</sub>H<sub>36</sub>BrN required *m/z* = 441.2031).

**G2-hexyl bromide (4):** 1,6-Dibromohexane (1.1 mL, 6.92 mmol) was added to a mixture of **3** (1.0 g, 1.40 mmol), KOH (0.31 g, 5.54 mmol), and *N,N*-dimethylformamide (DMF, 50 mL) at 0°C. The mixture was stirred at room temperature for 24 h and then quenched with water and CH<sub>2</sub>Cl<sub>2</sub> (20 ml) was added. The organic phase was washed with water (50 mL × 2) and brine solution (50 ml), dried over anhydrous Na<sub>2</sub>SO<sub>4</sub>, and filtered. The solvent was removed to dryness, and the crude product was purified by column chromatography (SiO<sub>2</sub>, CH<sub>2</sub>Cl<sub>2</sub>/hexane) to afford white solids (1.06 g, 86%); <sup>1</sup>H-NMR (600 MHz, CDCl<sub>3</sub>): δ = 8.18 (s, 2H), 8.15 (s, 4H), 7.64 (m, 4H), 7.44 (m, 4H), 7.31 (m, 4H), 4.49 (t, *J* = 7.2 Hz, 2H), 3.43 (m, 2H), 2.09-1.91 (m, 4H), 1.46 (s, 36H), 1.44 (m, 4H); <sup>13</sup>C-NMR (150 MHz, CDCl<sub>3</sub>): δ = 142.5, 140.3, 139.9, 129.9, 125.7, 123.5, 123.4, 123.0, 119.5, 116.2, 109.9, 109.1, 43.5, 34.7, 33.7, 32.6, 31.9, 29.1, 28.0, 27.3, 26.6; *m/z* (MALDI-TOF): 883.6050 (C<sub>58</sub>H<sub>66</sub>BrN<sub>3</sub> required *m/z* = 883.4440).

## 2. Additional data

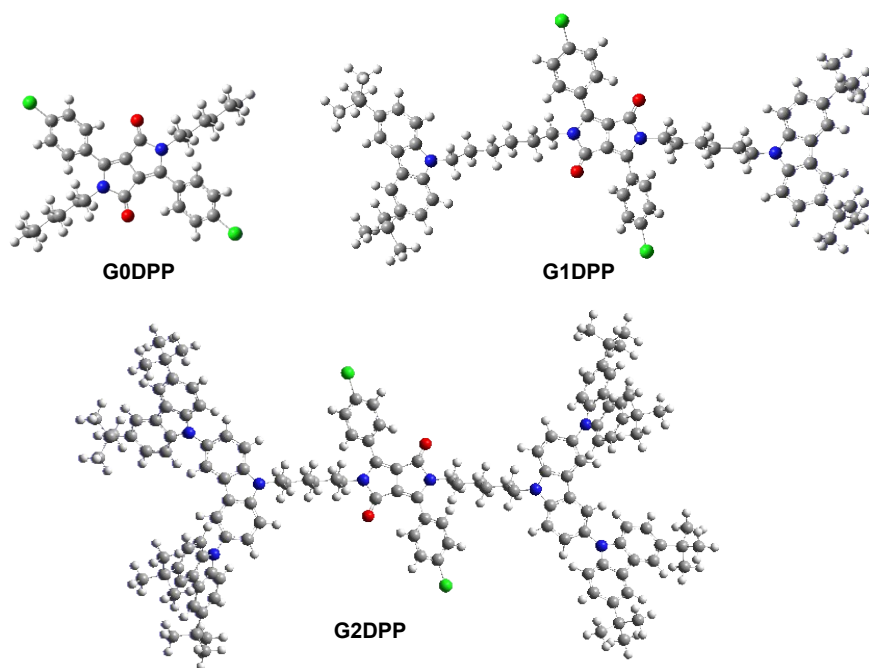

**Fig. S1** Optimized geometry of DPP derivatives simulated with using B3LYP/6-31G(d) function.

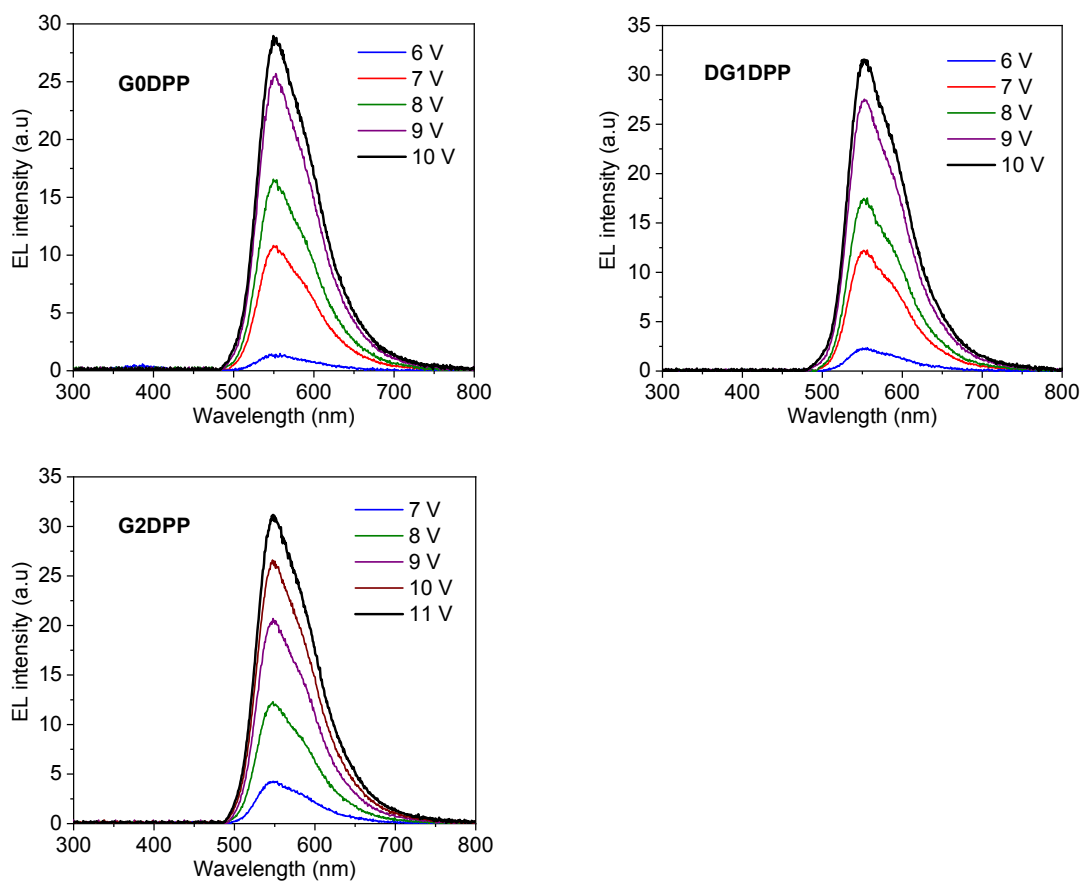

**Fig. S2** Electroluminescence (EL) spectra at various applied voltages of the fabricated OLEDs.

**Fig. S3** Copies of  $^1\text{H}$  NMR,  $^{13}\text{C}$  NMR and HRMS mass spectra of **Compound 2**

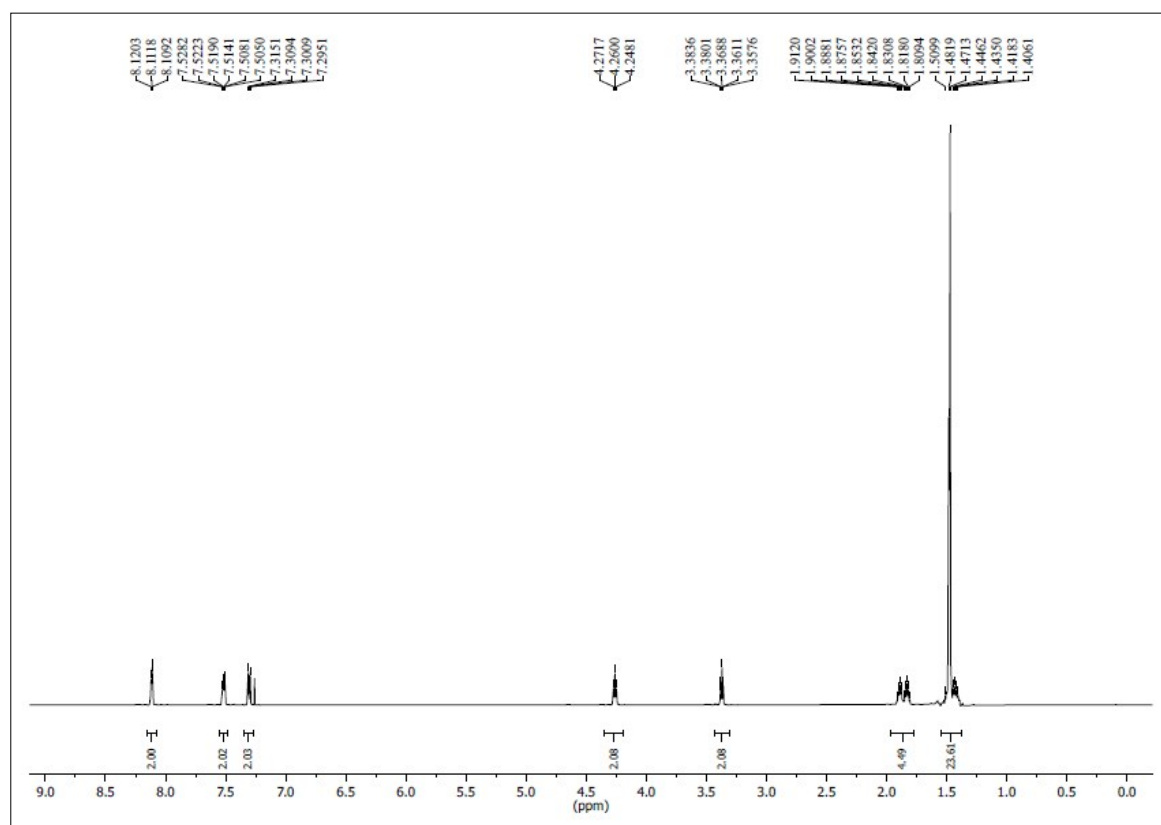

$^1\text{H}$ -NMR (600 MHz,  $\text{CDCl}_3$ )

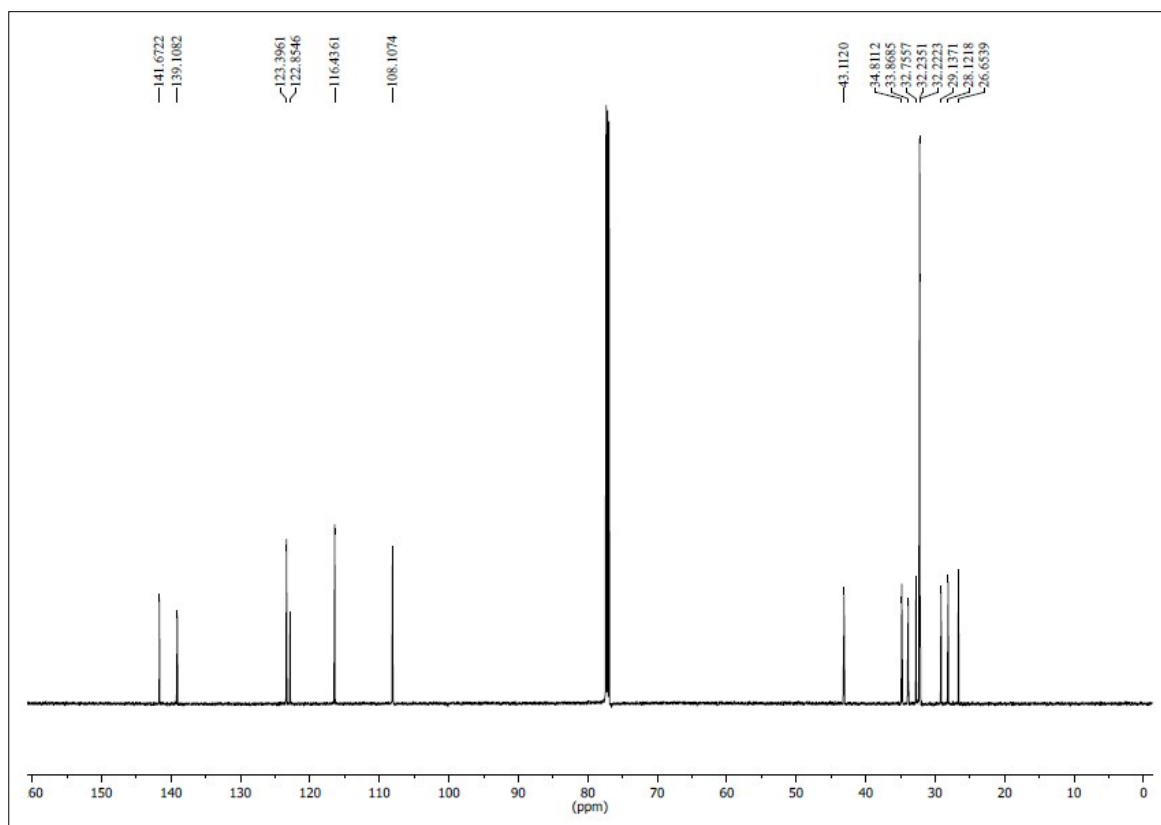

$^{13}\text{C}$ -NMR (150 MHz,  $\text{CDCl}_3$ )

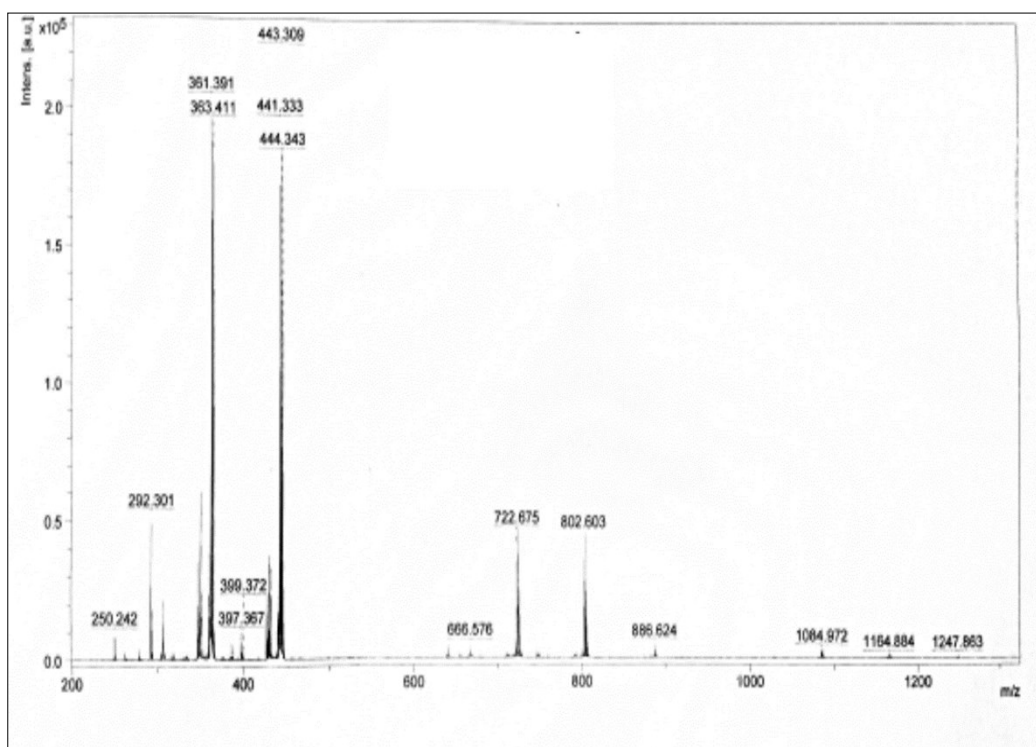

HRMS

Fig. S4 Copies of <sup>1</sup>H NMR, <sup>13</sup>C NMR and HRMS mass spectra of **Compound 4**

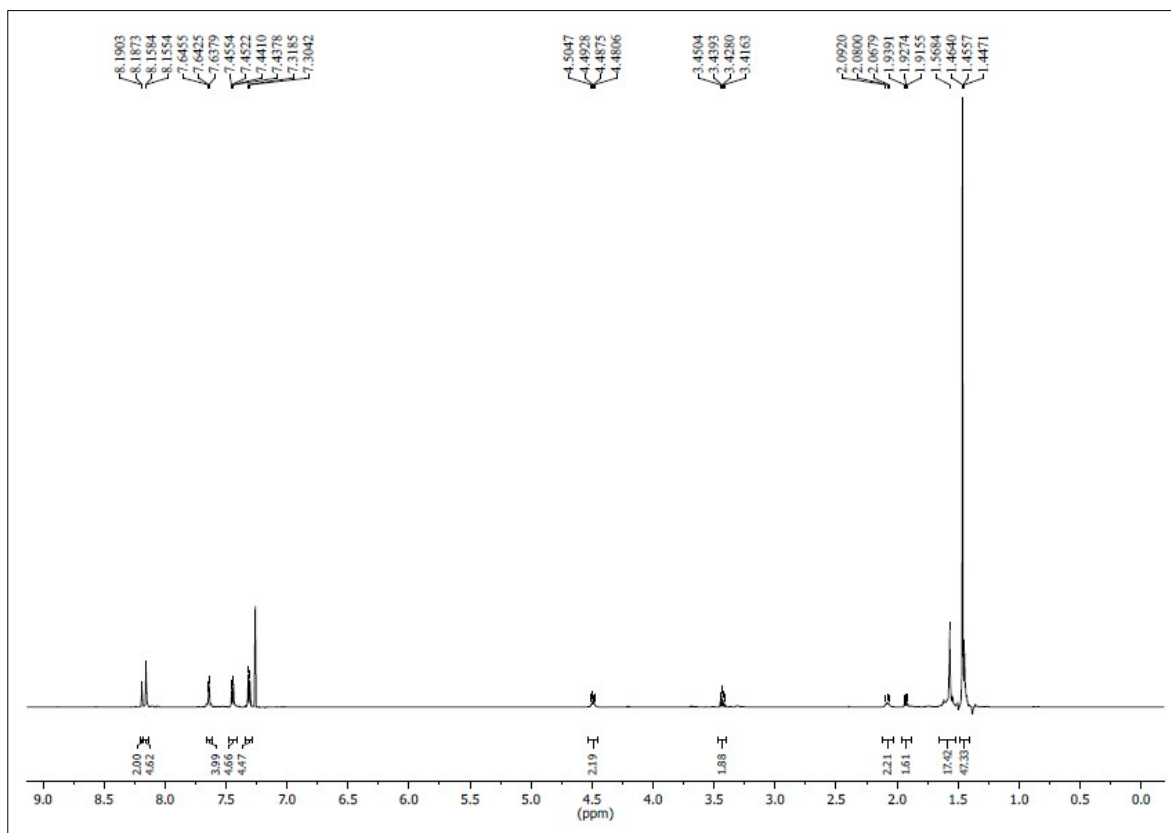

<sup>1</sup>H-NMR (600 MHz, CDCl<sub>3</sub>)

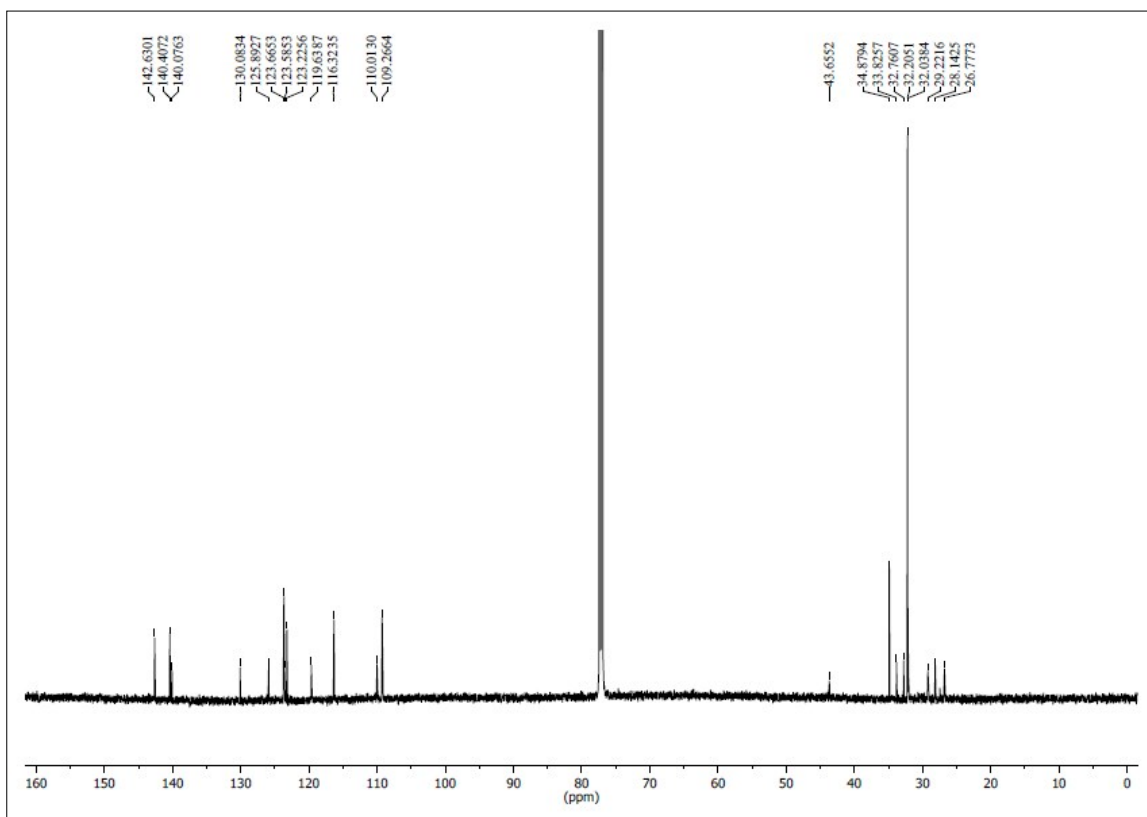

$^{13}\text{C}$ -NMR (150 MHz,  $\text{CDCl}_3$ )

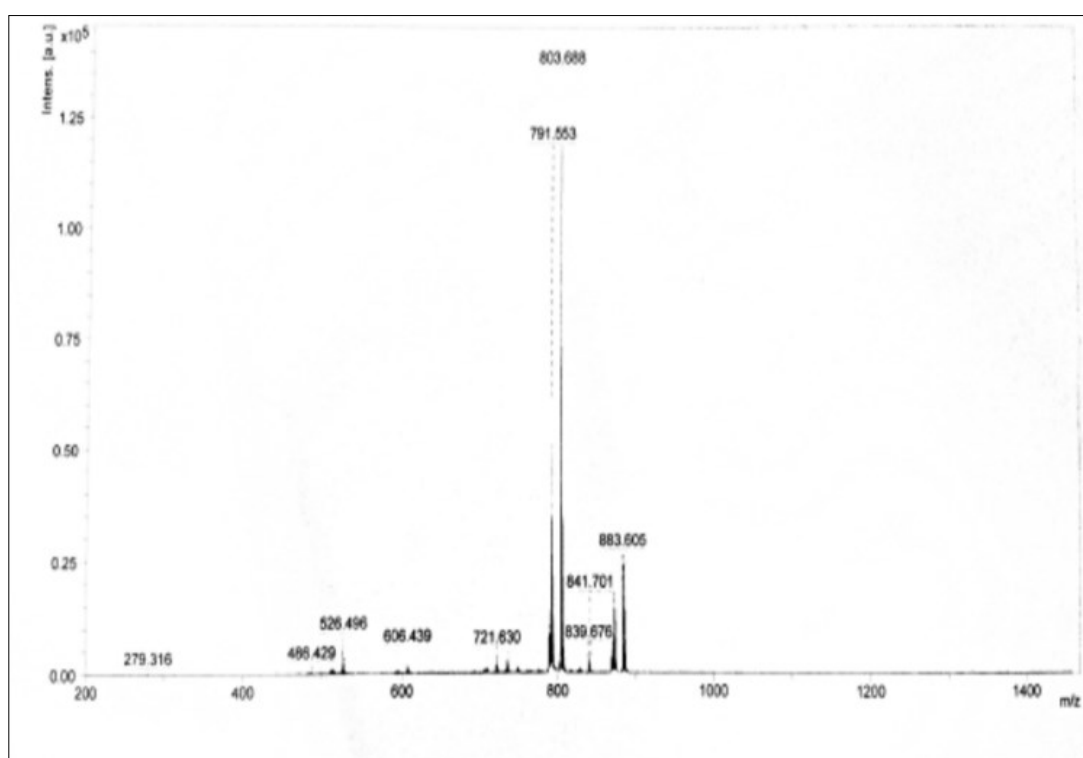

HRMS

**Fig. S5** Copies of  $^1\text{H}$  NMR,  $^{13}\text{C}$  NMR, FTIR and HRMS mass spectra of **G0DPP**

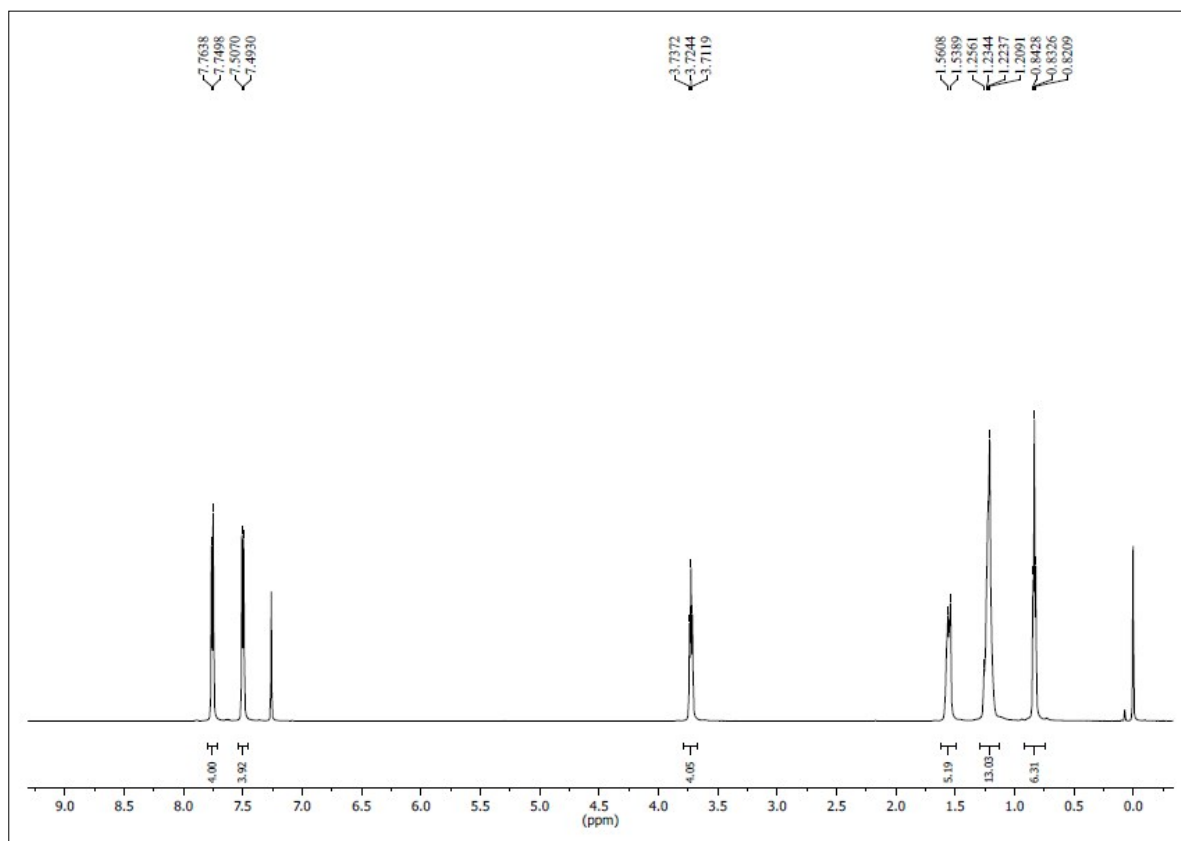

$^1\text{H}$ -NMR (600 MHz,  $\text{CDCl}_3$ )

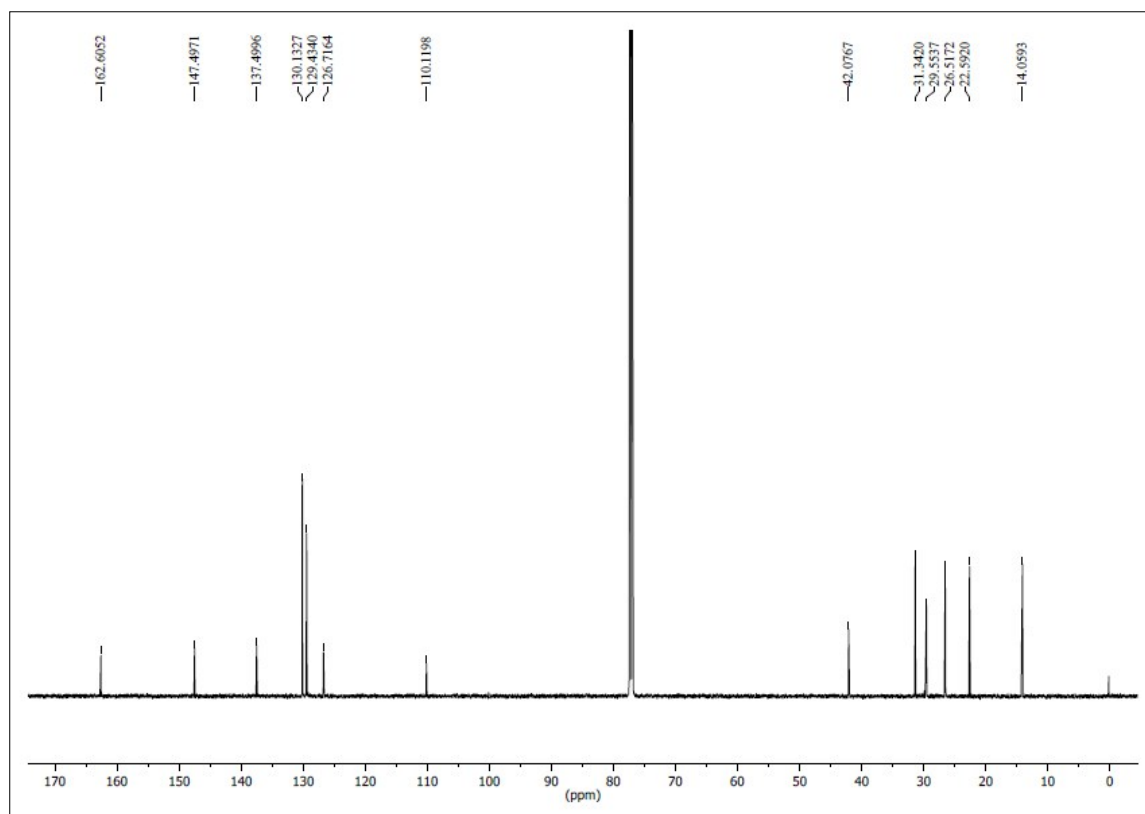

$^{13}\text{C}$ -NMR (150 MHz,  $\text{CDCl}_3$ )

### MALDI-TOF-MS Report

Frontier Research Center, Vidyasirimedhi Institute of Science and Technology

Comment 1 Ms 524.1897

Comment 2

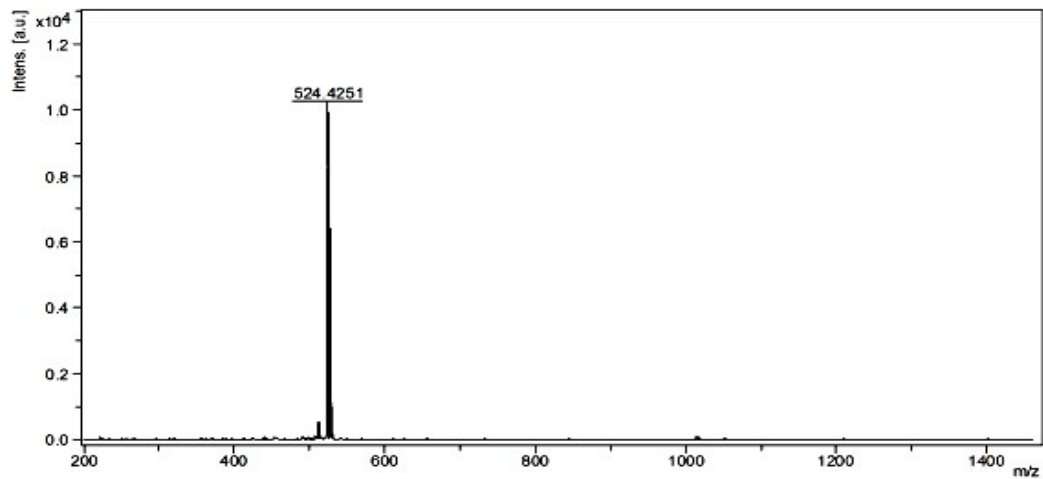

| m/z      | S/N | Quality Fac. | Res. | Intens. | Area |
|----------|-----|--------------|------|---------|------|
| 524.4251 | 753 |              | 5876 | 8196    | 855  |

Bruker Autoflex Speed

Printout: 3/10/2018 1:49:17 PM

HRMS

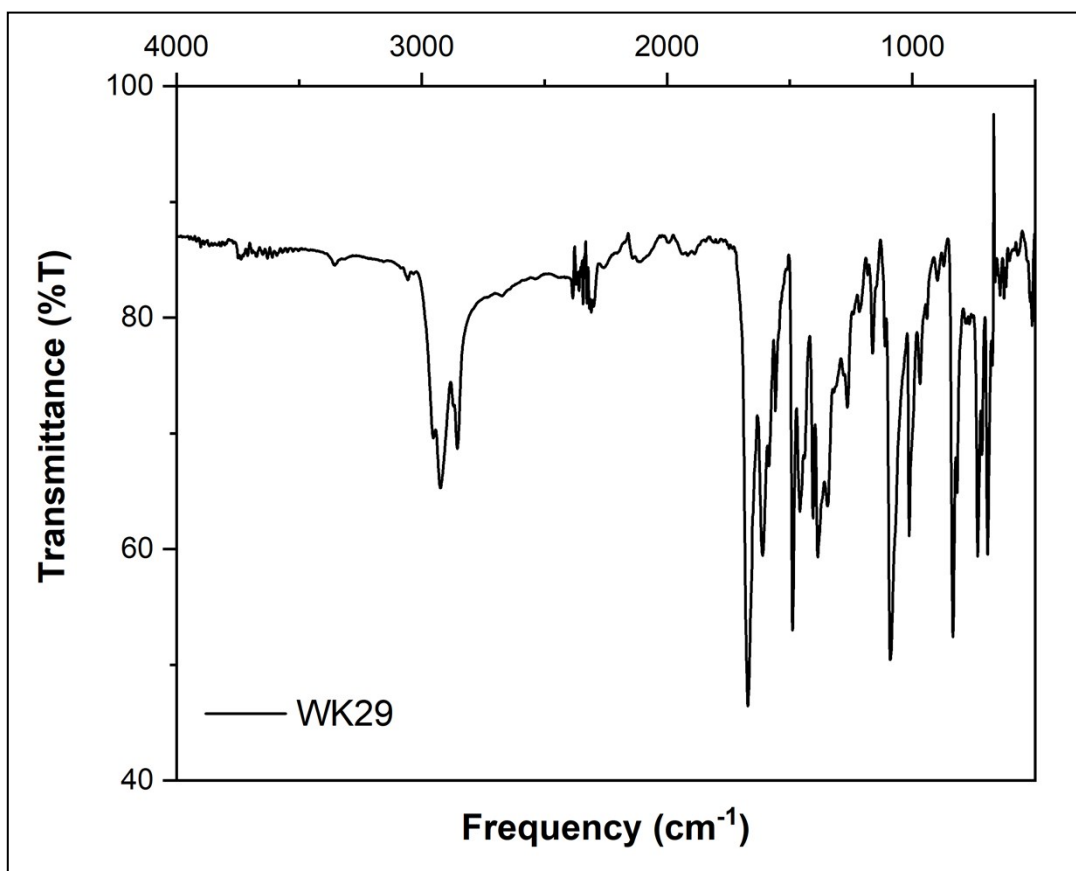

FT-IR



**Fig. S6** Copies of  $^1\text{H}$  NMR,  $^{13}\text{C}$  NMR, FTIR and HRMS mass spectra of **G1DPP**

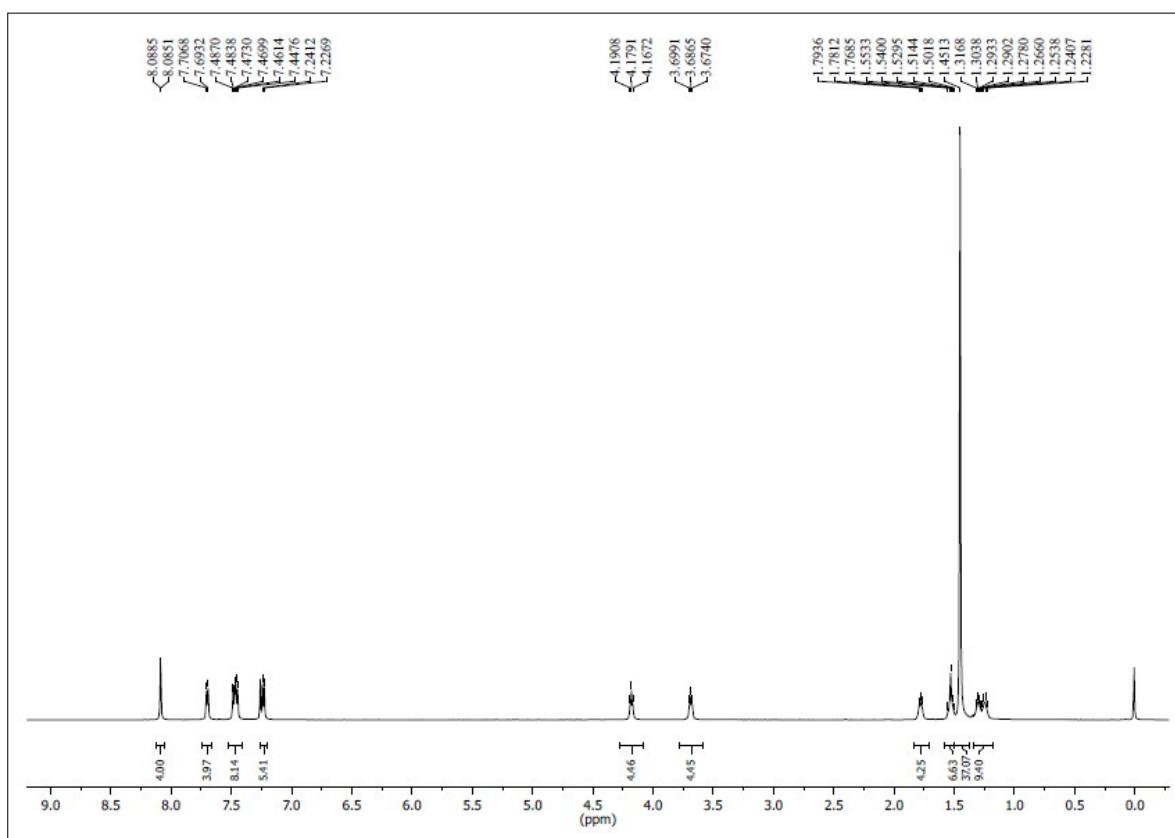

$^1\text{H}$ -NMR (600 MHz,  $\text{CDCl}_3$ )

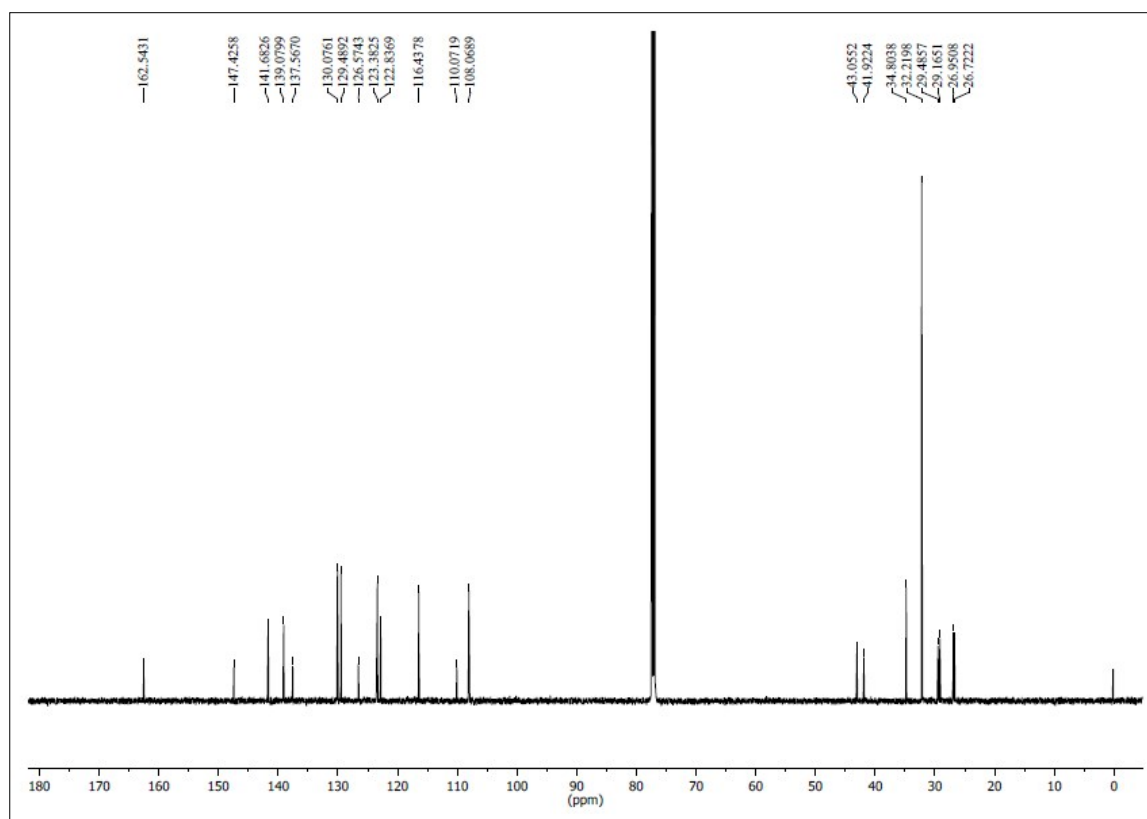

$^{13}\text{C}$ -NMR (150 MHz,  $\text{CDCl}_3$ )

### MALDI-TOF-MS Report

Frontier Research Center, Vidyasirimedhi Institute of Science and Technology

Comment 1 Ms 1078.5658

Comment 2

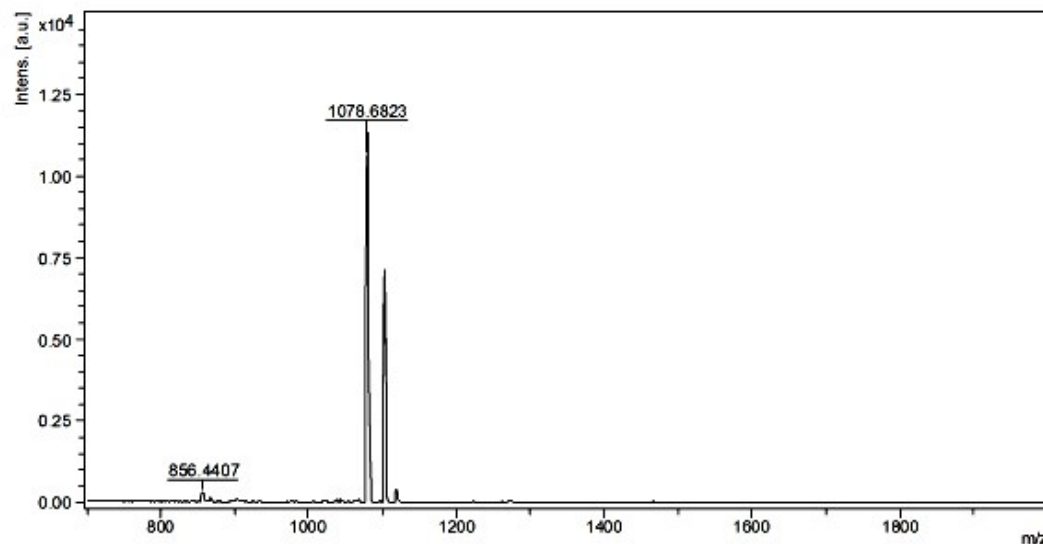

HRMS

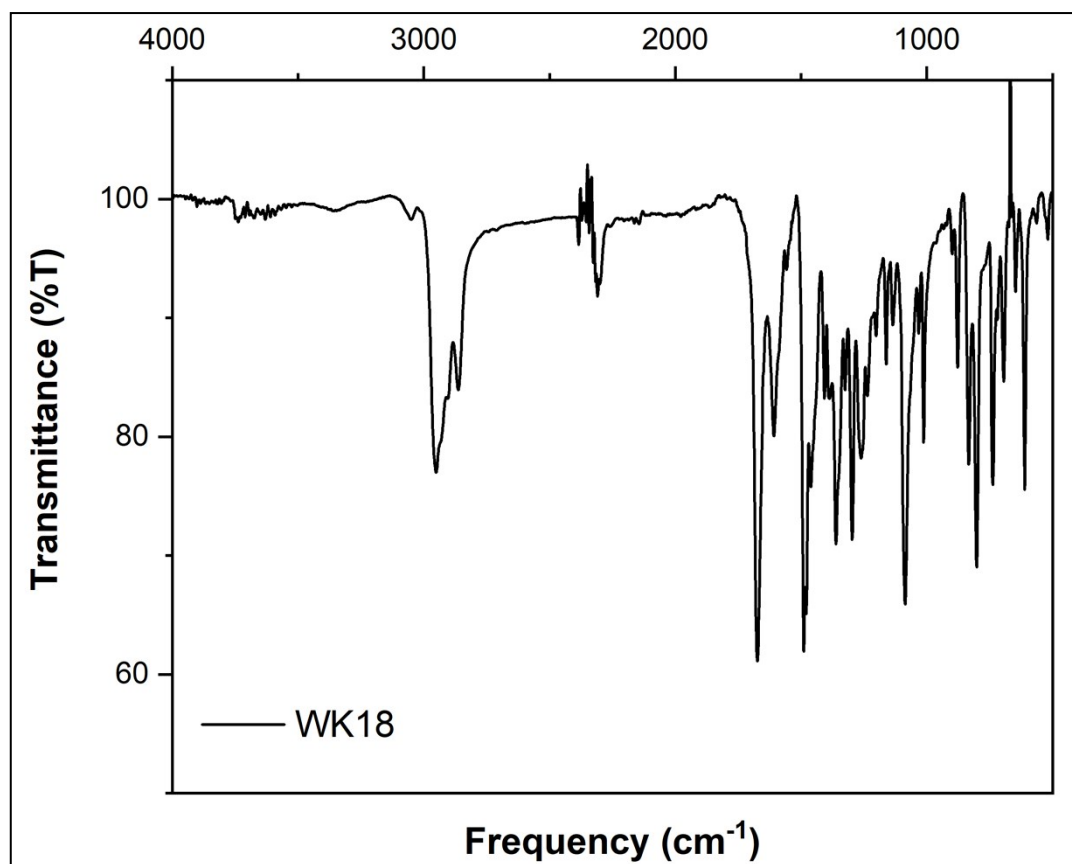

FT-IR

**Fig. S7** Copies of  $^1\text{H}$  NMR,  $^{13}\text{C}$  NMR, FTIR and HRMS mass spectra of **G2DPP**

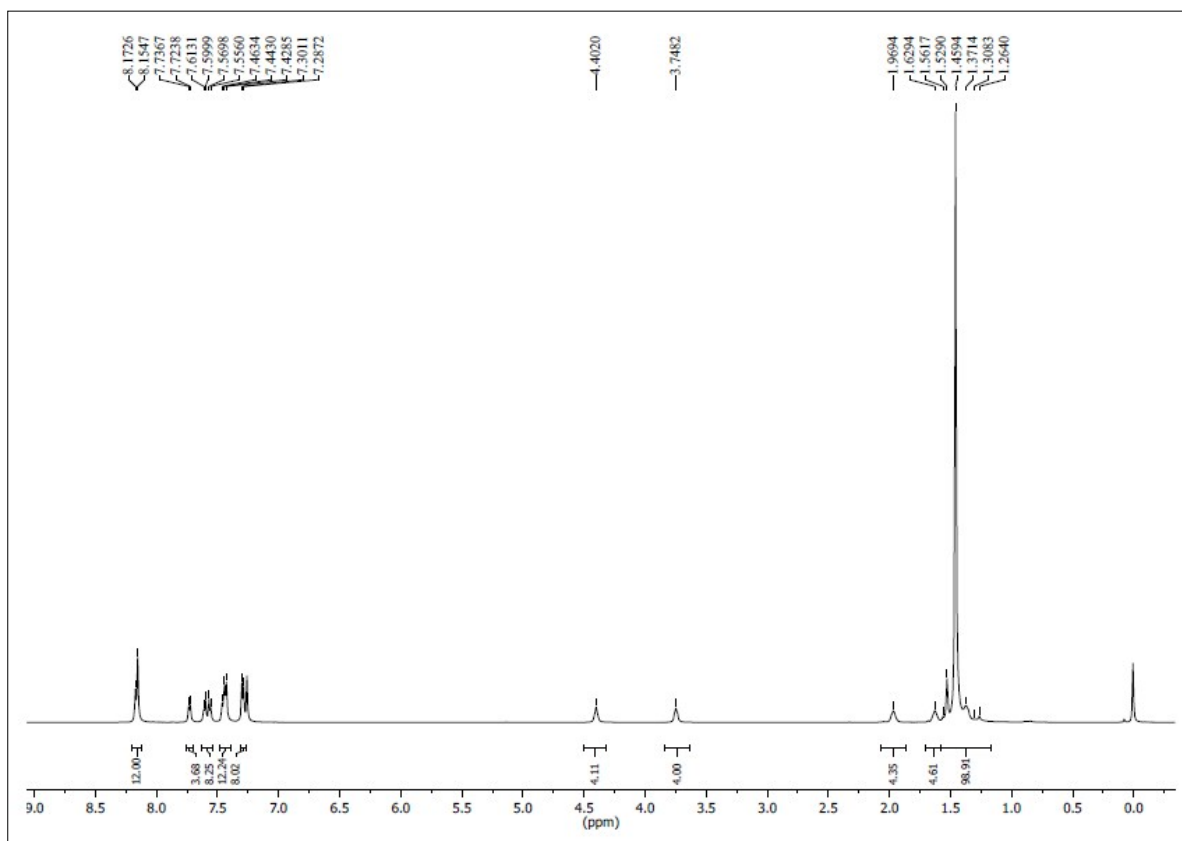

$^1\text{H}$ -NMR (600 MHz,  $\text{CDCl}_3$ )

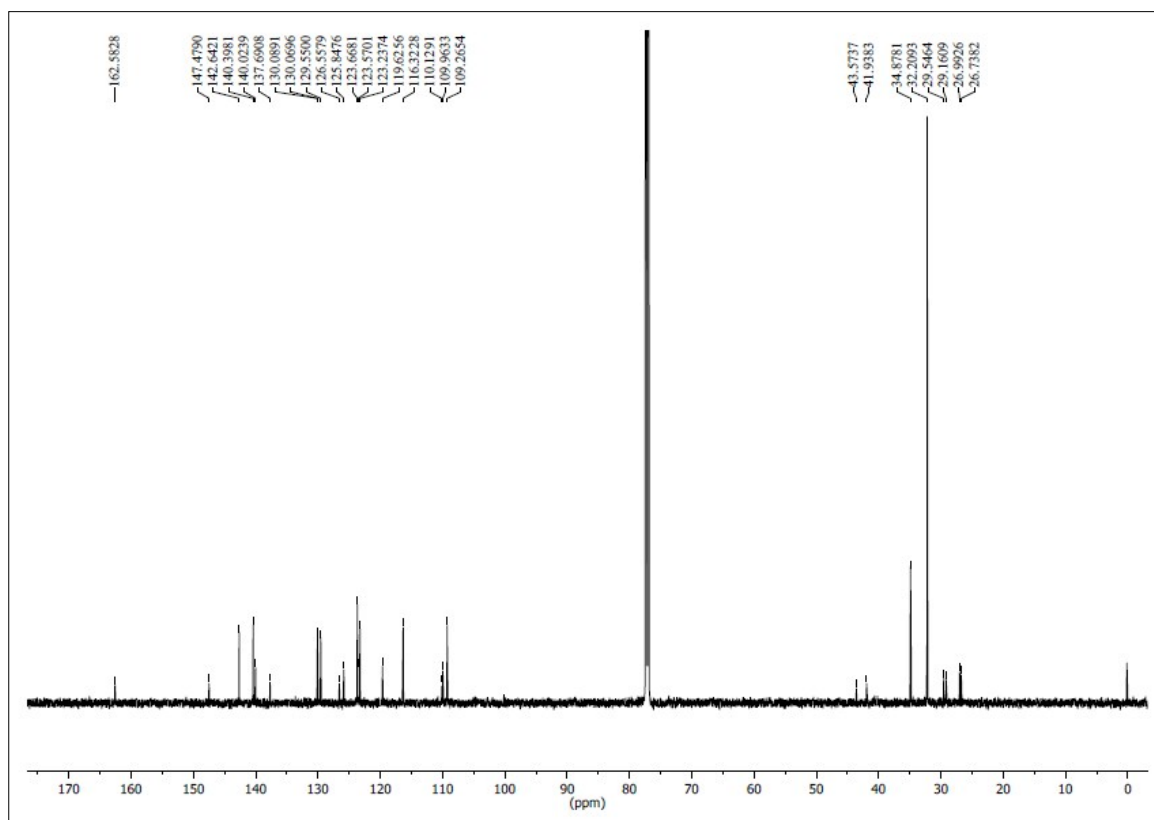

$^{13}\text{C}$ -NMR (150 MHz,  $\text{CDCl}_3$ )

### MALDI-TOF-MS Report

Frontier Research Center, Vidyasirimedhi Institute of Science and Technology

Comment 1 Ms 1963.0476  
Comment 2

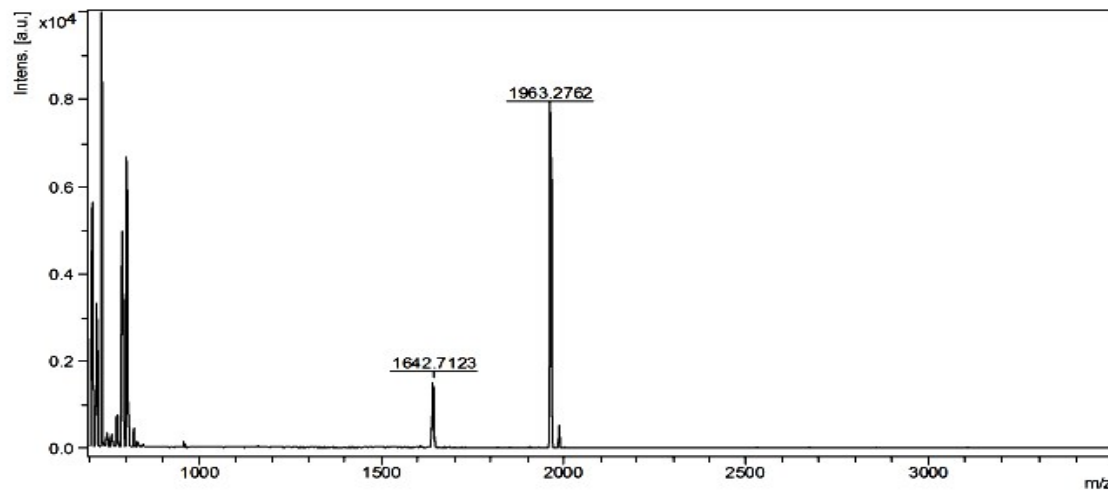

| m/z       | S/N | Quality Fac. | Res.  | Intens. | Area |
|-----------|-----|--------------|-------|---------|------|
| 1642.7123 | 123 |              | 2285  | 1531    | 1333 |
| 1963.2762 | 296 |              | 17950 | 2744    | 333  |

Bruker Autoflex Speed

Printout: 3/10/2018 1:48:16 PM

HRMS

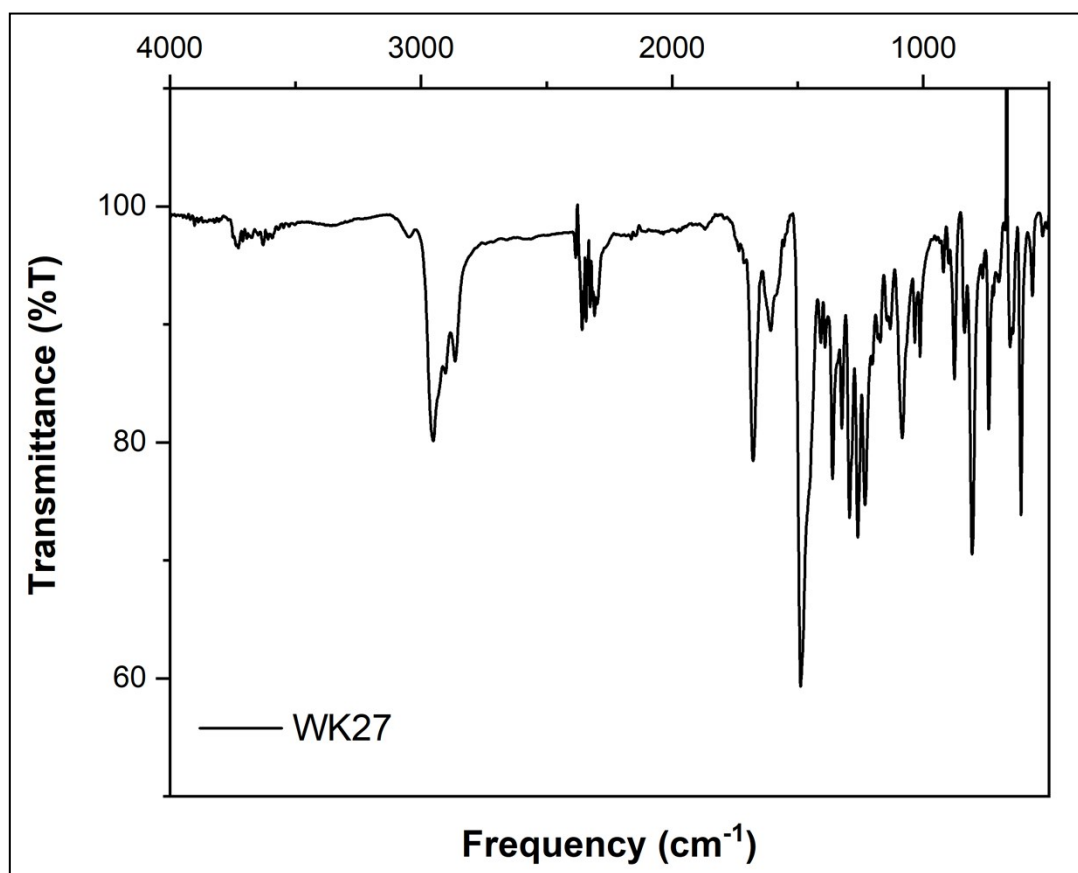

FT-IR
